# Supplementary material for: Fabrication, Characterization, and Microbial Biodegradation of Transparent Nanodehydrated Bioplastic (NDB) Membranes Using Novel Casting, Dehydration, and Peeling Techniques
Source: MDPI journal article supplement (doi:10.3390/polym15153303), 2023-08-04
Supplement: s1 [file s1]

# Fabrication, Characterization, and Microbial Biodegradation of Transparent Nanodehydrated Bioplastic (NDB) Membranes Using Novel Casting, Dehydration, and Peeling Techniques

Sherif S. Hindi <sup>1,\*</sup> and Mona Othman I. Albureikan <sup>2</sup>

<sup>1</sup> Department of Agriculture, Faculty of Environmental Sciences, King Abdulaziz University (KAU),  
P.O. Box 80208, Jeddah 21589, Saudi Arabia

<sup>2</sup> Department of Biological Sciences, Faculty of Science, King Abdulaziz University (KAU),  
P.O. Box 80208, Jeddah 21589, Saudi Arabia; malboraikan@kau.edu.sa

\* Correspondence: shindi@kau.edu.sa

This PDF file includes:

**Section S1.** The casting technique steps.

**Figure S1.** The practical procedure used for the novel casting of the (NDB) membranes.

**Section S2.** The machinery of the novel casting method.

**Figure S2.** The vibrational casting process of the polymeric blends into sheets.

**Section S3.** Chemophysical features of the polymers used in the bioplastic fabrication.

**Figure S3.** Chemical constituents of the polymers used to synthesis of the nanodehydrated-bioplastic (NDB) membranes: a) gum Arabic (GA) precursor, b) polyvinyl alcohol (PVA) precursor, c) [poly(methyl methacrylate), PMMA].

**Section S4.** Wettability of different types of plastics.

**Table S1.** Surface energy and contact angle of the most important industrial polymers.

**Section S5.** Thermogravimetric Analysis (TGA) of the NDB membranes.

**Table S2.** Calculating means of mass loss (ML) of the NDB membranes blended from gum Arabic (GA) and polyvinyl alcohol (PVA) in the six ratios and different temperature zones (T-zones).

**Section S6.** Estimation of pore diameter distribution.

**Figure S4.** Visualization analysis of void volumes (VV, nm<sup>3</sup>) of the six nanodehydrated-bioplastic membranes (NBMs): a) GA (100%), b) GA/PVA=1:0.25, c) GA/PVA=1:0.5, d), e) GA/PVA=1:0.75, and f) GA/PVA=1:1, and (PVA=100%) based on AFM-image analysis.

**Section S1.** The casting technique steps

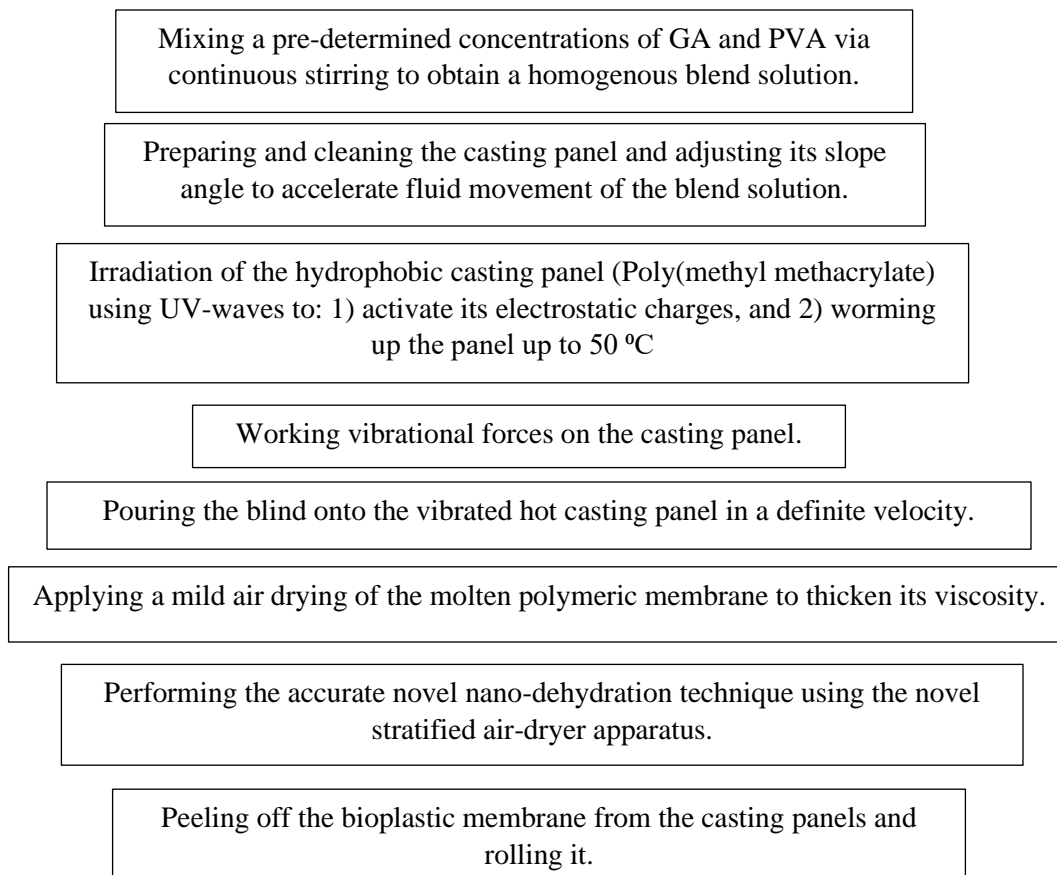

**Figure S1.** The practical procedure used for the novel casting of the bioplastic blends.

**Section S2.** The machinery of the novel casting method.

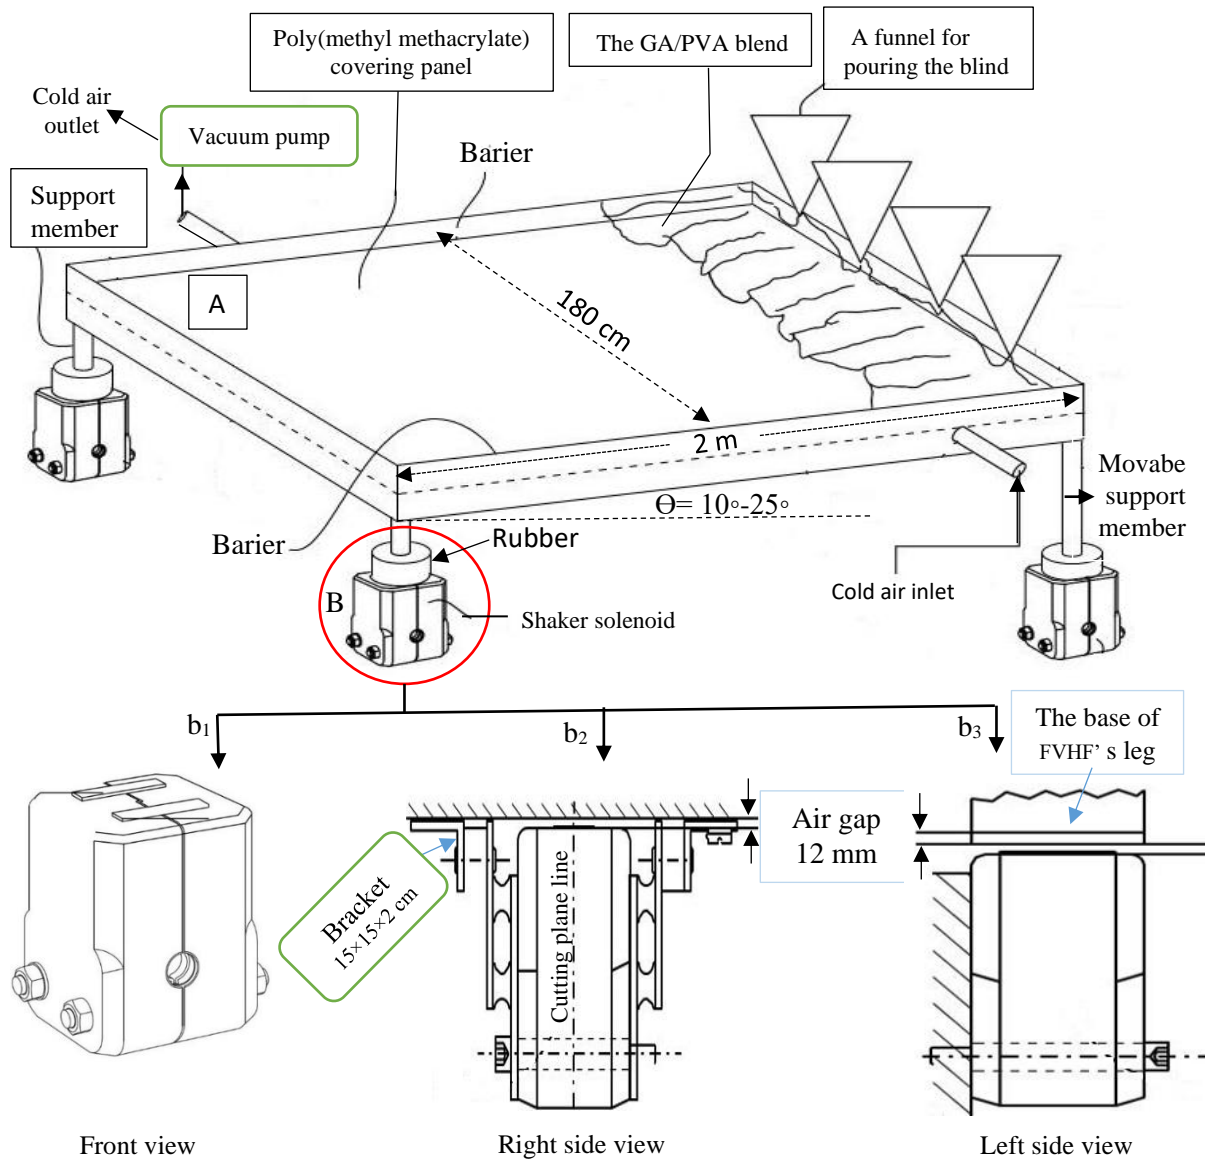

**Figure S2.** The casting process of the polymeric blends: A) the novel free vibrated-horizontal flow (FVHF) apparatus, and B) the magnetic vibrating system (shaker solenoid): b<sub>1</sub>) front view; b<sub>2</sub>) right side view showing the operational air gap (12 mm, thickness); b<sub>3</sub>) left side view [57].

**Section S3.** Chemophysical features of the polymers used in the bioplastic fabrication.

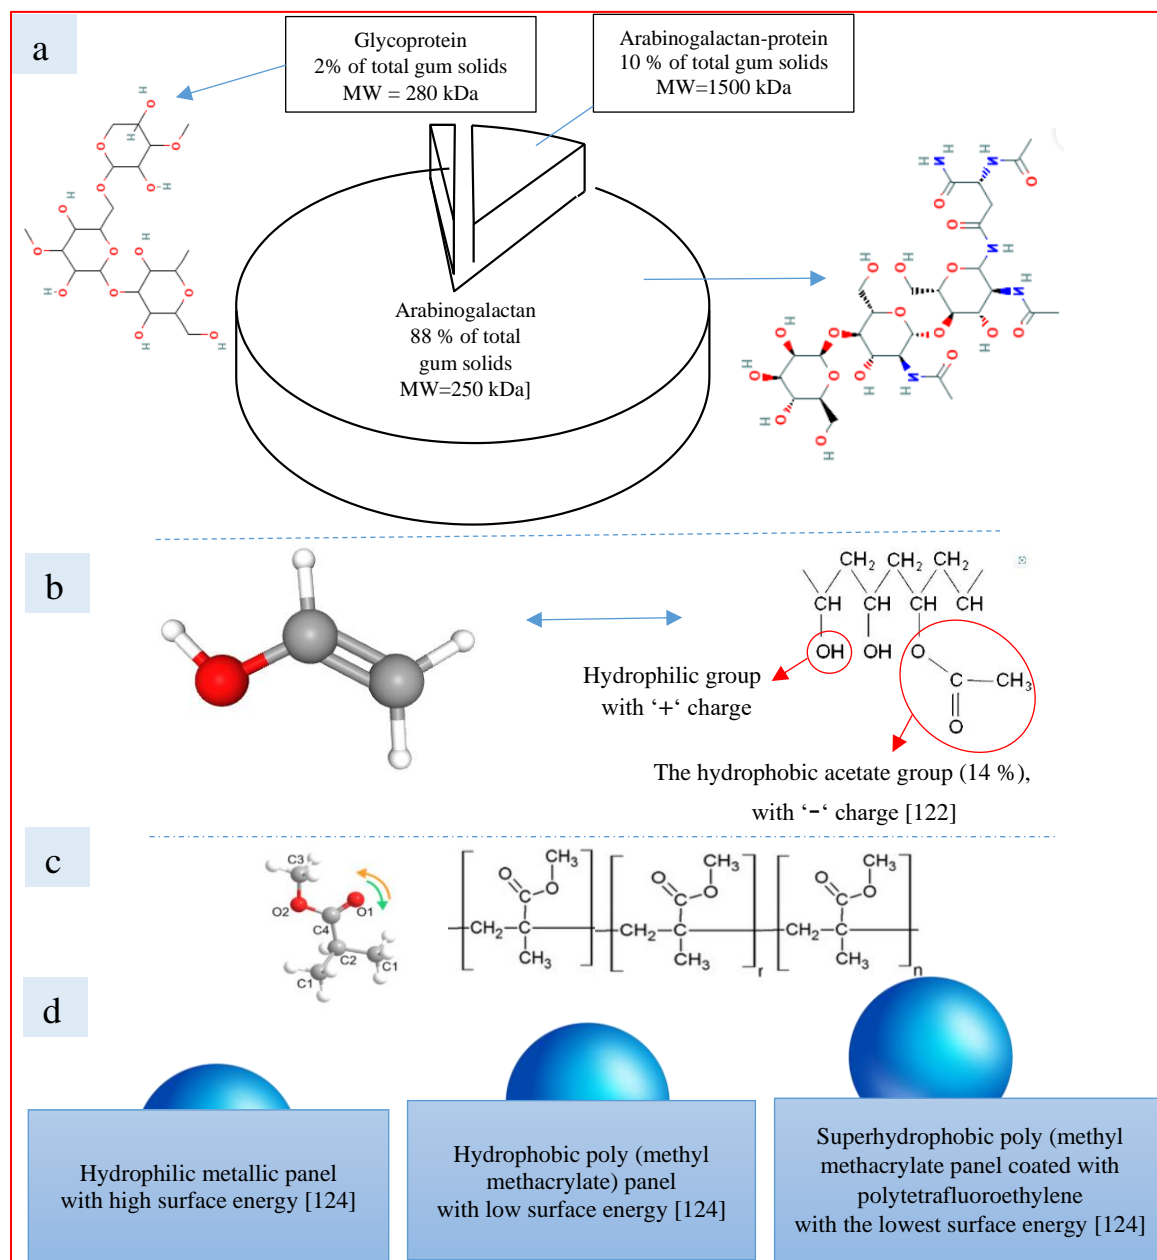

**Figure S3.** Chemical and physical features of the polymers used in manufacturing the NDB- membranes:  
a) gum Arabic (GA) precursor, b) polyvinyl alcohol (PVA) precursor, c) [poly(methyl methacrylate), PMMA] substrate [57.Hindi,Mona **2023**,93.Hindi et al 2017a, 114.Anonymous<sup>e</sup> 2023-115.Anonymous<sup>f</sup> 2023-116.Anonymous<sup>g</sup> 2023-117.Anonymous<sup>h</sup> 2023-118.Schmidt 1994, 122.Randall 1989].

**Section S4.** Wettability of different types of plastics.

**Table S1.** Surface energy and contact angle of the most important industrial polymers [[124.Elsabee 2012](#)].

| Polymer abbreviation | Polymer name                              | Surface energy dynes/cm | Contact angle degree <sup>-1</sup> |
|----------------------|-------------------------------------------|-------------------------|------------------------------------|
| PVA                  | Polyvinyl alcohol                         | 37                      | 10                                 |
| Pes                  | Polyester                                 | 41                      | 70                                 |
| PS                   | Polystyrene                               | 34                      | 72                                 |
| SAN                  | Styrene acrylonitrile                     | 40                      | 74                                 |
| PC                   | Polycarbonate                             | 46                      | 75                                 |
| PPO                  | Polyphenylene oxide                       | 47                      | 75                                 |
| PET                  | Polyethylene terephthalate                | 42                      | 76                                 |
| PVDF                 | Polyvinylidene fluoride                   | 25                      | 80                                 |
| ABS                  | Acrylonitrile butadiene styrene           | 35                      | 82                                 |
| PMMA                 | Poly (methyl methacrylate)                | 41                      | 82                                 |
| PI                   | Polyimide                                 | 40                      | 83                                 |
| PU                   | Polyurethane                              | 38                      | 85                                 |
| PPS                  | Polyphenylene sulfide                     | 38                      | 87                                 |
| PE                   | Polyethylene fluoride                     | 30                      | 88                                 |
| PBT                  | Polybutylene terephthalate                | 32                      | 88                                 |
| PP                   | Polypropylene                             | 30                      | 88                                 |
| PVCp                 | Polyvinyl chloride, plasticized           | 53                      | 89                                 |
| PES                  | Polyethersulfone                          | 46                      | 90                                 |
| PVCr                 | Polyvinyl chloride, rigid                 | 39                      | 90                                 |
| FEP                  | Fluorinated ethylene propylene            | 20                      | 98                                 |
| PDMS                 | Polydimethylsiloxane (silicone elastomer) | 23                      | 98                                 |
| PTFE                 | Polytetrafluoroethylene                   | 19                      | 120                                |
| NR                   | Natural rubber                            | 24                      | n.d.                               |

n.d.: not defined.

**Section S5. Thermogravimetric analysis (TGA) nanodehydrated-bioplastic (NDM) membranes**

**Table S2.** Calculating <sup>1-3</sup> means <sup>4,5</sup> of mass loss (M<sub>L</sub>) of the NDB membranes blended from gum Arabic (GA) and polyvinyl alcohol (PVA) in the six ratios and different temperature zones (T-zones).

| T-zones<br>°C | Mass loss (%)           |                        |                        |                        |                        |                        |
|---------------|-------------------------|------------------------|------------------------|------------------------|------------------------|------------------------|
|               | GA/PVA ratio            |                        |                        |                        |                        |                        |
|               | 1:0                     | 1:0.25                 | 1:0.5                  | 1:0.75                 | 1:1                    | 0:1                    |
| 50°-100°      | Iw <sup>6</sup> . 15.64 | Iw. 9.62               | Iw. 16.5               | Iw. 15.95              | Iw. 12.24              | Iw. 12.99              |
|               | Fw <sup>7</sup> . 13.5  | Fw. 9.18               | Fw. 15.7               | Fw. 15.15              | Fw. 11.6               | Fw. 12.25              |
|               | M <sub>L</sub> . 13.68  | M <sub>L</sub> . 4.57  | M <sub>L</sub> . 4.85  | M <sub>L</sub> . 5.02  | M <sub>L</sub> . 5.23  | M <sub>L</sub> . 5.69  |
| 100°-150°     | Iw. 13.5                | Iw. 9.18               | Iw. 15.7               | Iw. 15.15              | Iw. 11.6               | Iw. 12.25              |
|               | Fw. 12                  | Fw. 8.6                | Fw. 14.7               | Fw. 14.1               | Fw. 10.85              | Fw. 11.15              |
|               | M <sub>L</sub> . 11.11  | M <sub>L</sub> . 6.32  | M <sub>L</sub> . 6.37  | M <sub>L</sub> . 6.93  | M <sub>L</sub> . 6.47  | M <sub>L</sub> . 8.98  |
| 150°-200°     | Iw. 12                  | Iw. 8.6                | Iw. 14.7               | Iw. 14.1               | Iw. 10.85              | Iw. 11.15              |
|               | Fw. 11.5                | Fw. 8.18               | Fw. 13.75              | Fw. 13.5               | Fw. 10.5               | Fw. 10.25              |
|               | M <sub>L</sub> . 4.18   | M <sub>L</sub> . 4.88  | M <sub>L</sub> . 6.46  | M <sub>L</sub> . 4.26  | M <sub>L</sub> . 3.23  | M <sub>L</sub> . 8.07  |
| 200°-250°     | Iw. 11.5                | Iw. 8.18               | Iw. 13.75              | Iw. 13.5               | Iw. 10.5               | Iw. 10.25              |
|               | Fw. 10.7                | Fw. 7.64               | Fw. 12.9               | Fw. 13                 | Fw. 9.9                | Fw. 9.85               |
|               | M <sub>L</sub> . 6.96   | M <sub>L</sub> . 8.18  | M <sub>L</sub> . 6.18  | M <sub>L</sub> . 3.7   | M <sub>L</sub> . 5.71  | M <sub>L</sub> . 3.9   |
| 250°-300°     | Iw. 10.7                | Iw. 7.64               | Iw. 12.9               | Iw. 13                 | Iw. 9.9                | Iw. 9.85               |
|               | Fw. 9.9                 | Fw. 6.5                | Fw. 11.3               | Fw. 11.6               | Fw. 8.75               | Fw. 8.85               |
|               | M <sub>L</sub> . 7.48   | M <sub>L</sub> . 14.9  | M <sub>L</sub> . 7.36  | M <sub>L</sub> . 10.77 | M <sub>L</sub> . 11.62 | M <sub>L</sub> . 10.15 |
| 300°-350°     | Iw. 9.9                 | Iw. 6.5                | Iw. 11.3               | Iw. 11.6               | Iw. 8.75               | Iw. 8.85               |
|               | Fw. 7.7                 | Fw. 5.68               | Fw. 9.5                | Fw. 9                  | Fw. 6.25               | Fw. 7.25               |
|               | M <sub>L</sub> . 22.2   | M <sub>L</sub> . 12.62 | M <sub>L</sub> . 15.93 | M <sub>L</sub> . 22.41 | M <sub>L</sub> . 28.57 | M <sub>L</sub> . 18.08 |
| 350°-400°     | Iw. 7.7                 | Iw. 5.68               | Iw. 9.5                | Iw. 9                  | Iw. 6.25               | Iw. 7.25               |
|               | Fw. 6.3                 | Fw. 4.48               | Fw. 7                  | Fw. 6                  | Fw. 4.1                | Fw. 4.05               |
|               | M <sub>L</sub> . 18.2   | M <sub>L</sub> . 21.13 | M <sub>L</sub> . 26.32 | M <sub>L</sub> . 33.3  | M <sub>L</sub> . 34.4  | M <sub>L</sub> . 44.14 |
| 400°-450°     | Iw. 6.3                 | Iw. 4.48               | Iw. 7                  | Iw. 6                  | Iw. 4.1                | Iw. 4.05               |
|               | Fw. 4.5                 | Fw. 3.24               | Fw. 4.1 mg             | Fw. 3.65               | Fw. 2.2                | Fw. 0.85               |
|               | M <sub>L</sub> . 28.6   | M <sub>L</sub> . 27.68 | M <sub>L</sub> . 41.43 | M <sub>L</sub> . 39.17 | M <sub>L</sub> . 46.34 | M <sub>L</sub> . 79.01 |
| 450°-500°     | Iw. 4.5                 | Iw. 3.24               | Iw. 4.1                | Iw. 3.65               | Iw. 2.2                | Iw. 0.85               |
|               | Fw. 3.8                 | Fw. 2.64               | Fw. 3.2                | Fw. 2.75               | Fw. 1.2                | Fw. 0.35               |
|               | M <sub>L</sub> . 15.6   | M <sub>L</sub> . 18.52 | M <sub>L</sub> . 21.95 | M <sub>L</sub> . 24.66 | M <sub>L</sub> . 45.5  | M <sub>L</sub> . 58.82 |

<sup>1</sup> Using the following formula: M<sub>L</sub>, % = [(Iw-Fw)/Iw]×100], where

<sup>2</sup> Initial starting weight per mg of the GABM sample.

<sup>3</sup> Final starting weight per mg of the GABM sample.

<sup>4</sup> Each value is an average of 3 samples.

<sup>5</sup> Based on original oven-dry weight.



**Section S6.** Estimation of pore diameter of the bioplastic membranes.

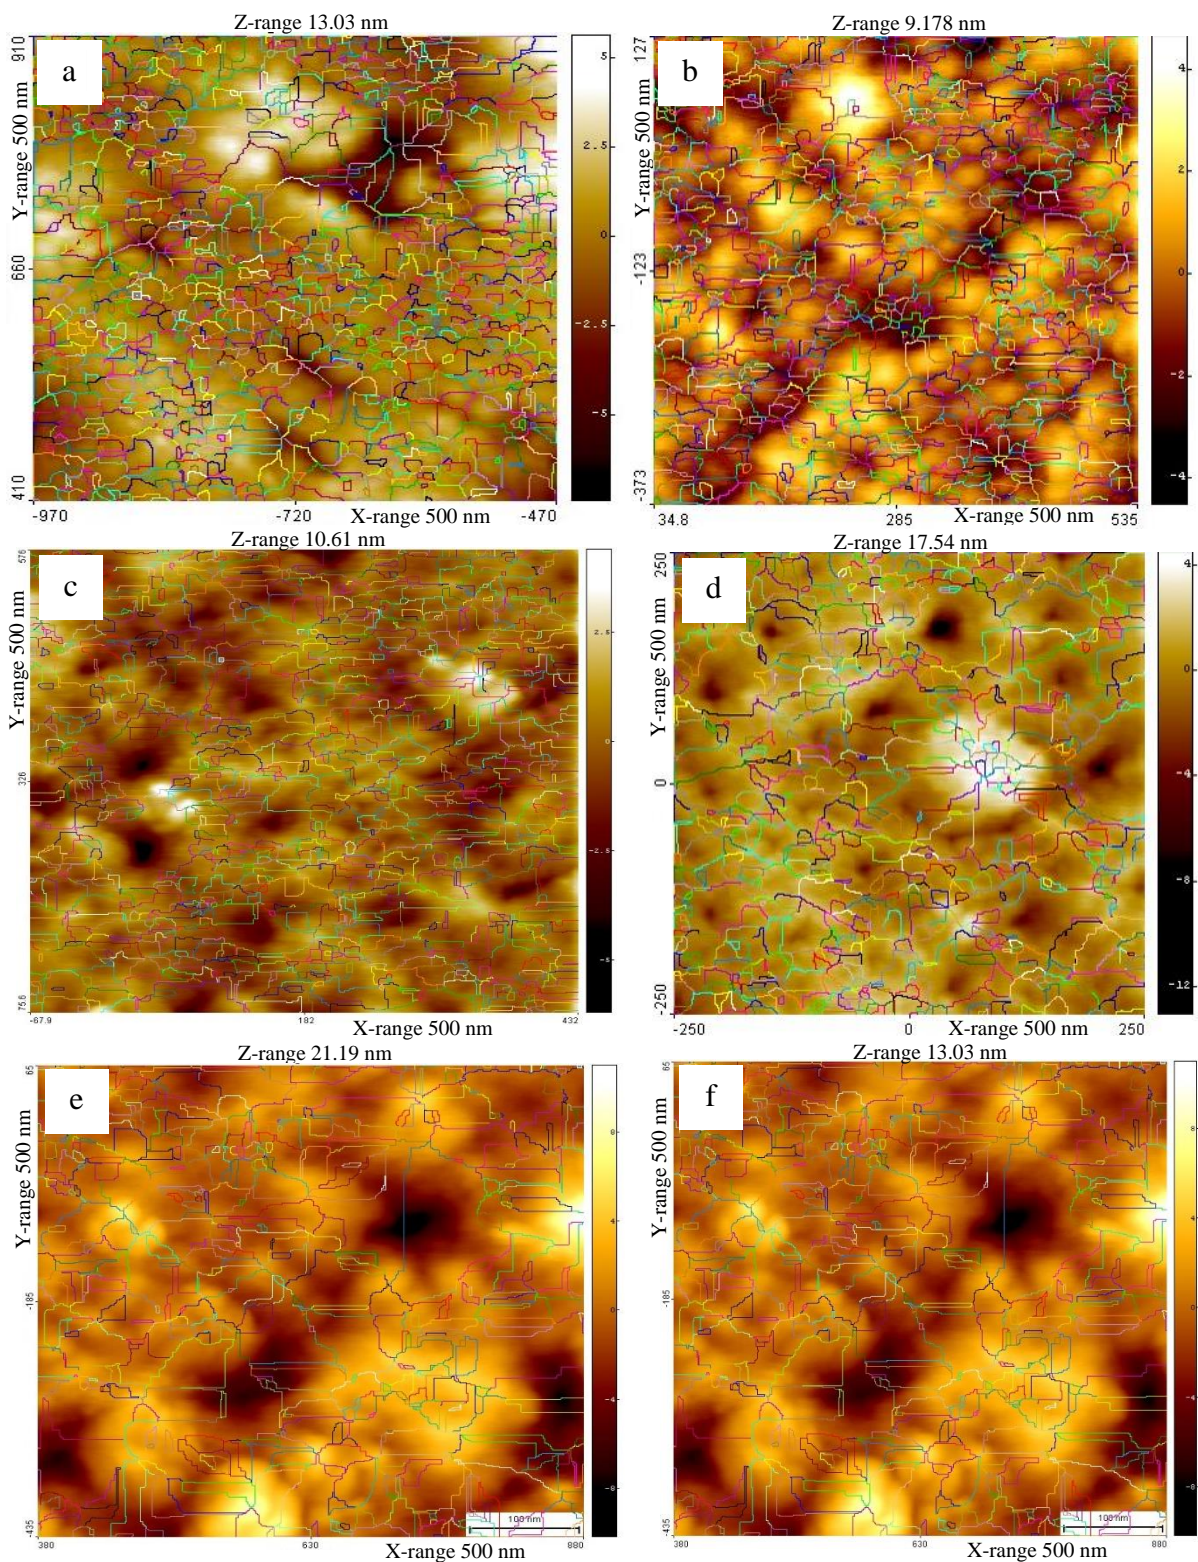

**Figure S4.** Visualization analysis of pore diameter (PO) of the six nanodehydrated-bioplastic (NDB) membranes (NBMs): a) GA (100%), b) GA/PVA=1:0.25, c) GA/PVA=1:0.5, d), e) GA/PVA=1:0.75, and f) GA/PVA=1:1, and (PVA=100%) based on AFM-image analysis.
